# Supplementary material
Source: PubMed Central journal article supplement (PMC8357457)
Supplement: NIHMS1634129-supplement-Fig-S1.pdf [file NIHMS1634129-supplement-Fig-S1.pdf]

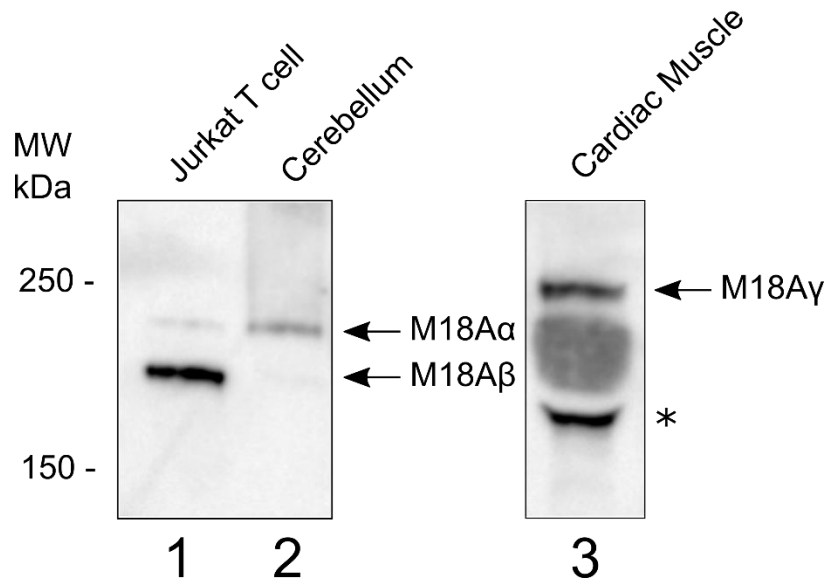

**Figure S1. Myosin 18A $\alpha$  is the predominant isoform expressed in the cerebellum.** Representative Western blot performed on a human Jurkat T cell extract (lane 1), a whole adult mouse cerebellum extract (lane 2), and whole adult mouse cardiac muscle extract (lane 3) probed with an anti-myosin 18A antibody against the C-terminal 300 residues of myosin 18A $\alpha/\beta$ , 252 of which are present within the tail domain of myosin 18A $\gamma$ . The expected positions for the heavy chains of myosin 18A $\alpha$ , myosin 18 $\beta$  and myosin 18A $\gamma$  are indicated. The origin of the large, diffuse signal in the cardiac sample in lane 3 is unknown, and the asterisk in lane 3 marks a putative novel spliced isoform of myosin 18A in cardiac muscle.
