# Supplementary material
Source: PubMed Central journal article supplement (PMC8357457)
Supplement: NIHMS1634129-supplement-Fig-s4.pdf [file NIHMS1634129-supplement-Fig-s4.pdf]

A

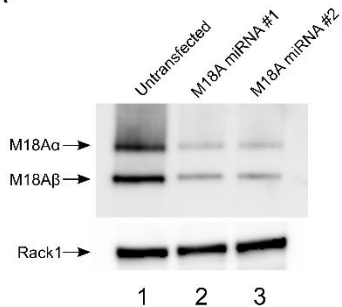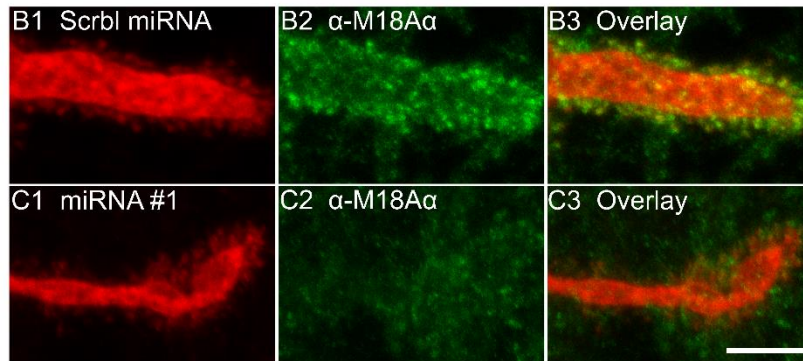

D

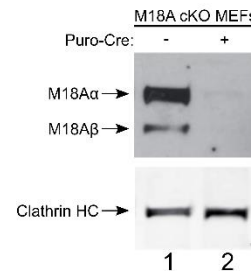

**Figure S5. miRNA-mediated knockdown of myosin 18A $\alpha$ .** (A) Representative Western blot of whole cell extracts of mouse NIH 3T3 mouse fibroblasts that were either untransfected (lane 1) or transfected with two different miRNAs directed against myosin 18A $\alpha$  (miRNA #1, lane 2; miRNA #2, lane 3). Rack1 was used as a loading control. Densitometry indicated that the level of myosin 18A $\alpha$  was reduced by  $81 \pm 10\%$  and  $84 \pm 9\%$  by miRNAs #1 and #2, respectively (N=3). Because 3T3 fibroblasts (unlike Purkinje neurons) also express myosin 18A $\beta$  (which shares with myosin 18A $\alpha$  both miRNA targeting sequences), its levels were also reduced by both miRNAs by  $\sim 80\%$ . (B1-B3) Shown is a portion of a dendrite from a representative cultured Purkinje neuron (DIV 18) that was expressing a scrambled control miRNA and that was fixed and stained for mCherry (to amplify the signal from the miRNA-associated mCherry volume marker) (B1) and for myosin 18A $\alpha$  (B2); Overlay (B3). (C1-C3) As in Panels B1-B3, except the Purkinje neuron was expressing myosin 18A $\alpha$  miRNA #2. Control and knockdown neurons were imaged on the same day with identical settings on a Zeiss 780 confocal microscope so that the intensities for myosin 18A $\alpha$  can be directly compared. (D) Representative Western blot of whole cell extracts of mouse embryo fibroblasts (MEFs) isolated from a conditional myosin 18A knockout mouse (M18 cKO; see Methods) that were (lane 2) or were not (lane 1) transfected with a puromycin-resistant plasmid harboring Cre recombinase (Puro-Cre). The expected positions for the heavy chains of myosin 18A $\alpha$  and myosin 18A $\beta$  are shown. Clathrin heavy chain (HC) was used as a loading control. Scale bar: 5  $\mu\text{m}$  (B3).
