# Supplementary material
Source: PubMed Central journal article supplement (PMC8357457)
Supplement: NIHMS1634129-supplement-Fig-s6.pdf [file NIHMS1634129-supplement-Fig-s6.pdf]

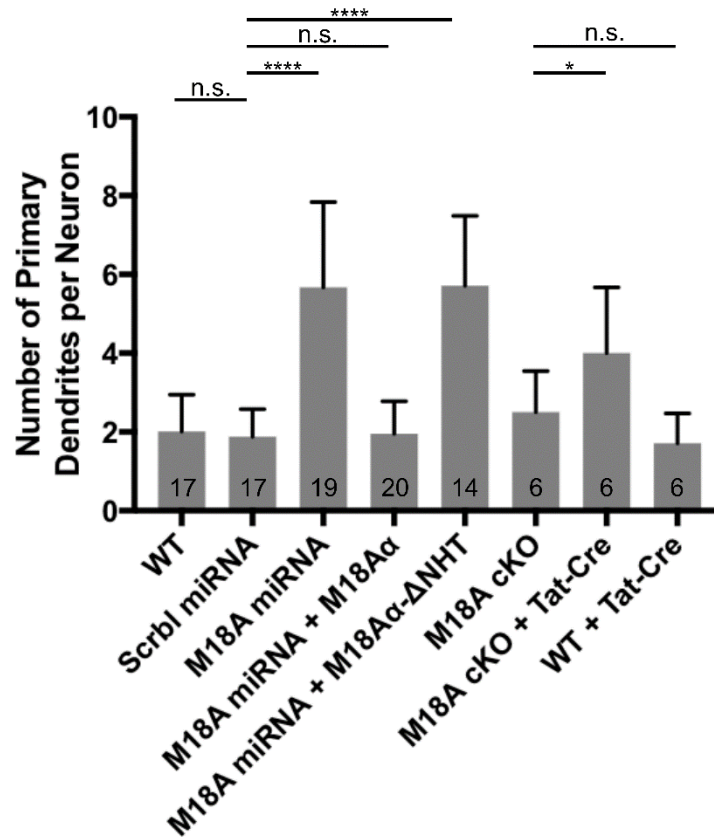

**Figure S7. Loss of myosin 18A $\alpha$  results in an increase in the number of primary dendrites.** The number of primary dendrites per neuron (DIV 18) for the indicated samples. The number of neurons scored from one experiment is indicated within each bar. \*  $p < 0.05$ ; \*\*\*\*  $p < 0.0001$ ; n.s., not significant. We note that while mature Purkinje neurons in situ possess only one primary dendrite, our control cells typically exhibit two, as seen previously for cultured Purkinje neurons (115, 116).
